# Supplementary material for: Optimizing Sparse Testing for Genomic Prediction of Plant Breeding Crops
Source: MDPI journal article supplement (doi:10.3390/genes14040927), 2023-04-17
Supplement: s1 [file s1]

### **Maize\_250 small data set**

In the smaller version of the previous data set (with only 250 lines) we observe that in terms of APC, in all scenarios of testing proportions, the best prediction performance was recorded under a multi-trait framework and the worst under a uni-trait framework (**Figure S1, Table S1**). However, the superiority of the multi-trait model over the uni-trait model was more modest in the whole maize data set, in which a larger superiority was detected. Nevertheless, we also observed a similar prediction performance between the five percentage of testing even in the scenario with 85% (0.85) of testing. No significant differences were observed between the four sparse testing methods, as we see only slight differences in the five different percentage of testing. For example, under the 15% (0.15) of testing set in the multi-trait model, M3 outperformed M1, M2 and M4 by 15.4, 2.9 and 6.3% respectively, while under the uni-trait model, M3 only outperformed M1, M2 and M4 by 1.0, 0.7 and 7.7% respectively. Under the 85% (0.85) testing multi-trait method, M4 outperformed methods M1, M2 and M3 by 10.67%, 10.19% and 6% respectively. No relevant differences were observed between methods in most of the proportion of testing evaluated.

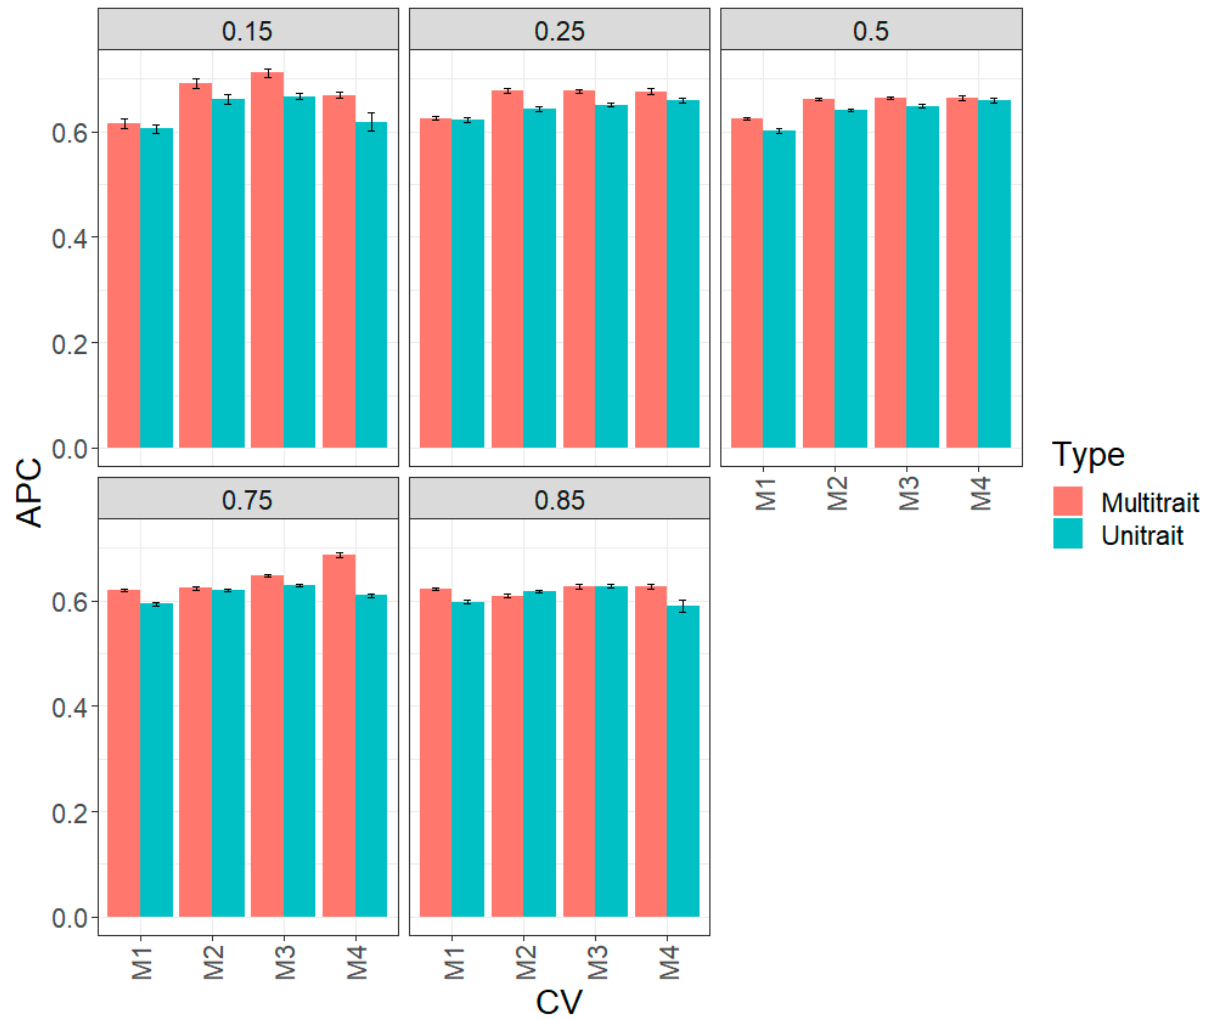

**Figure S1.** Prediction performance for small maize\_250 data set in terms of average Pearson's correlation (APC) of the four methods of sparse testing (M1, M2, M3 and M4) under unit-trait and multi-trait models for 5 percentage of testing 15% (0.1), 25% (0.25), 50% (0.5), 75% (0.75) and 85% (0.85).

The multi-trait model was better than the uni-trait model in terms of NRMSE (**Figure S2, Table S1**), but the superiority was lower than under the maize data set. The best predictions in terms of NRMSE were under methods M3 and M4. Under the percentage of testing of 25% (0.25), we observed that in the uni-trait model, M4 and uni-trait outperformed methods M1, M2 and M3 by 8.2, 11.9 and 3.2 % respectively, but under the multi-trait model M4 outperformed methods M1, M2 and M3 by 6.8, 8.6 and 0.3 % respectively. While under the percentage of testing of 50% (0.5) and under the uni-trait model, the method M4 outperformed methods M1, M2 and M3 by 9.1, 15.6

and 4.7 % respectively. Nevertheless, for the other percentages of testing, no relevant differences were observed between methods.

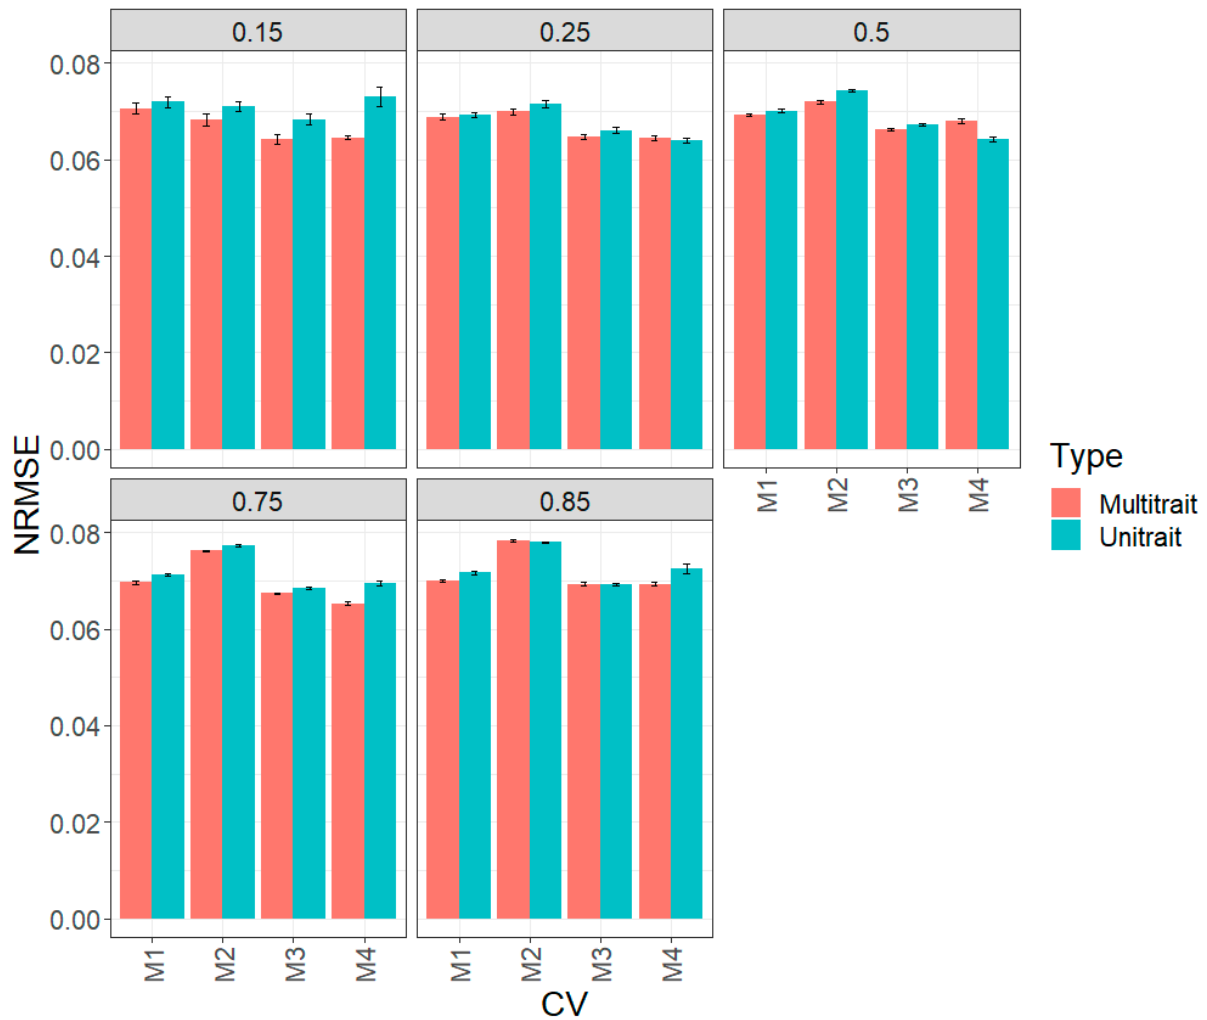

**Figure S2.** Prediction performance for small maize\_250 data set in terms of normalized root mean square error (NRMSE) of the four methods of sparse testing (M1, M2, M3 and M4) under unit-trait and multi-trait models for 5 percentage of testing 15% (0.1), 25% (0.25), 50% (0.5), 75% (0.75) and 85% (0.85).

**Table S1.** Prediction performance for the small maize\_250 data in terms of normalized root mean square error (NRMSE) and Average Pearson's correlation (APC) of the four sparse testing methods (CV) under the following proportion of testing (Prop\_testing): 15% (0.15), 25% (0.2), 50% (0.5), 75% (0.75) and 85% (0.85). NRMSE\_SE denotes the standard error of NRMSE and APC\_SE denotes the standard error of APC.

| Dataset   | CV | Prop_testing | Type       | NRMSE | NRMSE_SE | APC   | APC_SE |
|-----------|----|--------------|------------|-------|----------|-------|--------|
| Maize_250 | M1 | 0.15         | Multitrait | 0.071 | 0.002    | 0.616 | 0.019  |
| Maize_250 | M1 | 0.15         | Unitrait   | 0.072 | 0.002    | 0.606 | 0.017  |
| Maize_250 | M1 | 0.25         | Multitrait | 0.069 | 0.001    | 0.626 | 0.009  |
| Maize_250 | M1 | 0.25         | Unitrait   | 0.069 | 0.001    | 0.623 | 0.009  |
| Maize_250 | M1 | 0.5          | Multitrait | 0.069 | 0.001    | 0.625 | 0.006  |
| Maize_250 | M1 | 0.5          | Unitrait   | 0.070 | 0.001    | 0.602 | 0.009  |
| Maize_250 | M1 | 0.75         | Multitrait | 0.070 | 0.001    | 0.621 | 0.005  |
| Maize_250 | M1 | 0.75         | Unitrait   | 0.071 | 0.001    | 0.594 | 0.007  |
| Maize_250 | M1 | 0.85         | Multitrait | 0.070 | 0.001    | 0.622 | 0.005  |
| Maize_250 | M1 | 0.85         | Unitrait   | 0.072 | 0.001    | 0.598 | 0.006  |
| Maize_250 | M2 | 0.15         | Multitrait | 0.068 | 0.003    | 0.691 | 0.017  |
| Maize_250 | M2 | 0.15         | Unitrait   | 0.071 | 0.002    | 0.662 | 0.018  |
| Maize_250 | M2 | 0.25         | Multitrait | 0.070 | 0.001    | 0.677 | 0.009  |
| Maize_250 | M2 | 0.25         | Unitrait   | 0.072 | 0.002    | 0.643 | 0.009  |
| Maize_250 | M2 | 0.5          | Multitrait | 0.072 | 0.001    | 0.661 | 0.005  |
| Maize_250 | M2 | 0.5          | Unitrait   | 0.074 | 0.001    | 0.641 | 0.005  |
| Maize_250 | M2 | 0.75         | Multitrait | 0.076 | 0.000    | 0.624 | 0.005  |
| Maize_250 | M2 | 0.75         | Unitrait   | 0.077 | 0.000    | 0.620 | 0.004  |
| Maize_250 | M2 | 0.85         | Multitrait | 0.078 | 0.000    | 0.609 | 0.006  |
| Maize_250 | M2 | 0.85         | Unitrait   | 0.078 | 0.000    | 0.618 | 0.005  |
| Maize_250 | M3 | 0.15         | Multitrait | 0.064 | 0.002    | 0.712 | 0.016  |

|           |    |      |            |       |       |       |       |
|-----------|----|------|------------|-------|-------|-------|-------|
| Maize_250 | M3 | 0.15 | Unitrait   | 0.068 | 0.002 | 0.667 | 0.012 |
| Maize_250 | M3 | 0.25 | Multitrait | 0.065 | 0.001 | 0.677 | 0.008 |
| Maize_250 | M3 | 0.25 | Unitrait   | 0.066 | 0.001 | 0.651 | 0.007 |
| Maize_250 | M3 | 0.5  | Multitrait | 0.066 | 0.001 | 0.664 | 0.007 |
| Maize_250 | M3 | 0.5  | Unitrait   | 0.067 | 0.001 | 0.649 | 0.005 |
| Maize_250 | M3 | 0.75 | Multitrait | 0.067 | 0.000 | 0.648 | 0.004 |
| Maize_250 | M3 | 0.75 | Unitrait   | 0.069 | 0.001 | 0.629 | 0.005 |
| Maize_250 | M3 | 0.85 | Multitrait | 0.069 | 0.001 | 0.627 | 0.008 |
| Maize_250 | M3 | 0.85 | Unitrait   | 0.069 | 0.001 | 0.628 | 0.005 |
| Maize_250 | M4 | 0.15 | Multitrait | 0.065 | 0.001 | 0.669 | 0.011 |
| Maize_250 | M4 | 0.15 | Unitrait   | 0.073 | 0.004 | 0.619 | 0.035 |
| Maize_250 | M4 | 0.25 | Multitrait | 0.064 | 0.001 | 0.677 | 0.010 |
| Maize_250 | M4 | 0.25 | Unitrait   | 0.064 | 0.001 | 0.660 | 0.008 |
| Maize_250 | M4 | 0.5  | Multitrait | 0.068 | 0.001 | 0.664 | 0.009 |
| Maize_250 | M4 | 0.5  | Unitrait   | 0.064 | 0.001 | 0.660 | 0.009 |
| Maize_250 | M4 | 0.75 | Multitrait | 0.065 | 0.001 | 0.687 | 0.008 |
| Maize_250 | M4 | 0.75 | Unitrait   | 0.070 | 0.001 | 0.610 | 0.007 |
| Maize_250 | M4 | 0.85 | Multitrait | 0.069 | 0.001 | 0.627 | 0.008 |
| Maize_250 | M4 | 0.85 | Unitrait   | 0.073 | 0.002 | 0.590 | 0.022 |

### Wheat\_250 small data set

In the smaller version of the wheat data set (with 250 lines) in terms of APC, we did not observe any significant differences between the multi-trait and uni-trait models in all scenarios of testing proportions (**Figure S3, Table S2**). Nevertheless, we also observed a similar prediction performance between the five percentage of testing even in the scenario with 85% (0.85) of testing, that is, the prediction performance does not decrease as the percentage of testing increases. We

observe in **Figure S3** only slight differences between the four sparse testing methods. For example, under the 15% (0.15) of testing set the M3 in the multi-trait model, outperformed M1, M2 and M4 by 5.0, 1.0 and 2.0% respectively, while under the uni-trait model M3 only outperformed M1, M2 and M4 by 7.4, 2.6 and 1.1% respectively. Under the 25% (0.25) testing and multi-trait method, M3 outperformed methods M1, M2 and M4 by 4.8%, 1.2% and 0.005% respectively. No relevant differences were observed between methods in most of the proportion of testing evaluated.

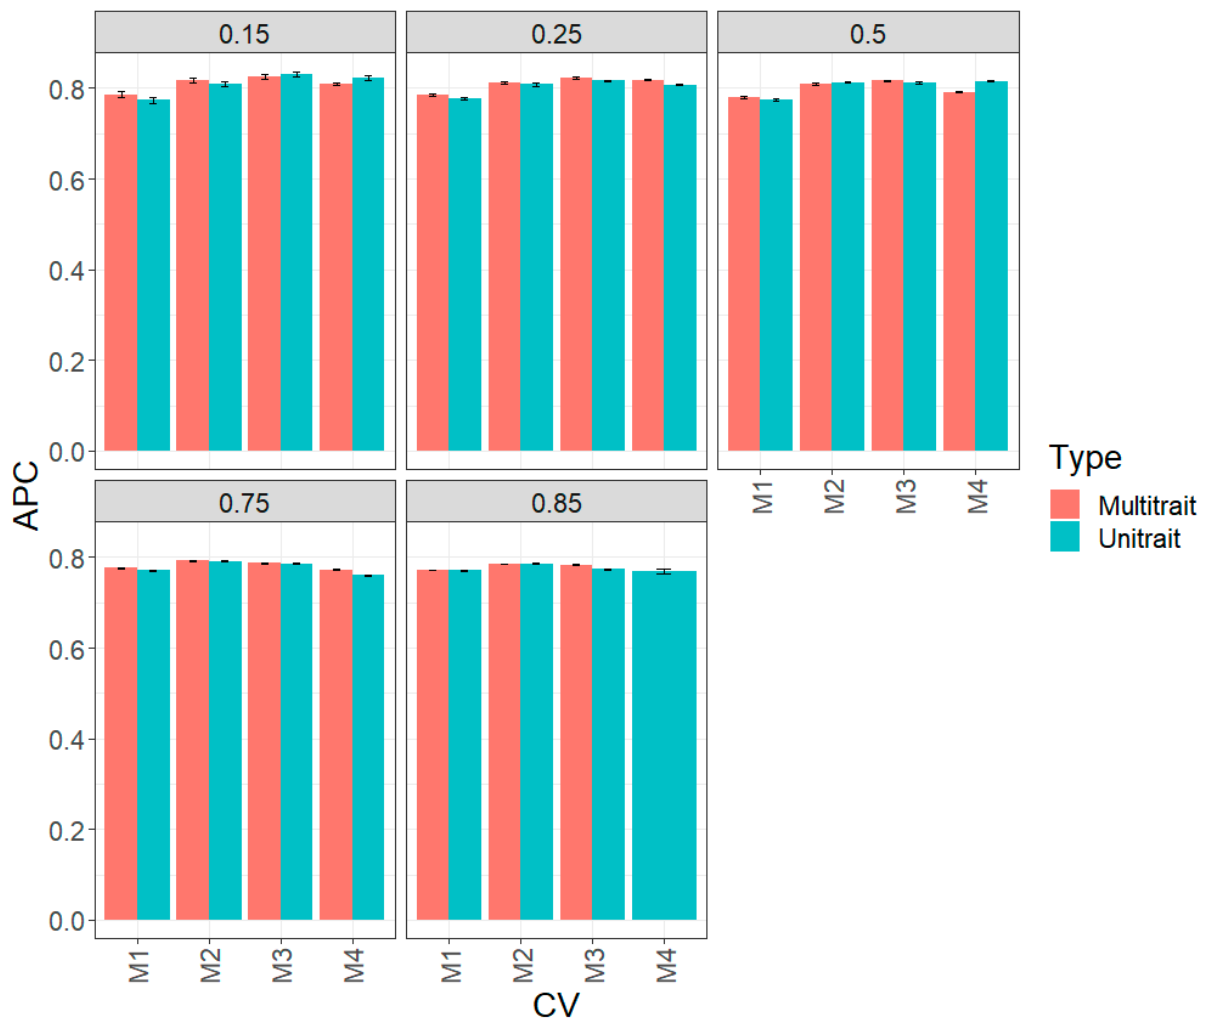

**Figure S3.** Prediction performance for wheat\_250 small data set in terms of average Pearson's correlation (APC) of the four methods of sparse testing (M1, M2, M3 and M4) under unit-trait and multi-trait models for 5 percentage of testing 15% (0.1), 25% (0.25), 50% (0.5), 75% (0.75) and 85% (0.85).

Now, the multi-trait model was only slightly better than the uni-trait model in terms of NRMSE (**Figure S4, Table S2**). Likewise, the best predictions in terms of NRMSE were under method M3. Under the percentage of testing of 15% (0.15) we observed that method M4 in the uni-trait model outperformed methods M1 and M2 by 7.4 and 2.72 % respectively, but under the multi-trait model, M4 outperformed only M1 by 3.2%. Under the percentage of testing of 25% (0.25) the method M3 under multi-trait model outperformed methods M1, M2 and M3 by 9.5, 3.8 and 3.9 % respectively. While under the uni-trait model, M3 outperformed M1, M2 and M3 by 7.4, 3.7 and 5.1 % respectively. Nevertheless, for the other percentage of testing, no relevant differences were observed between methods (**Figure S4, Table S2**).

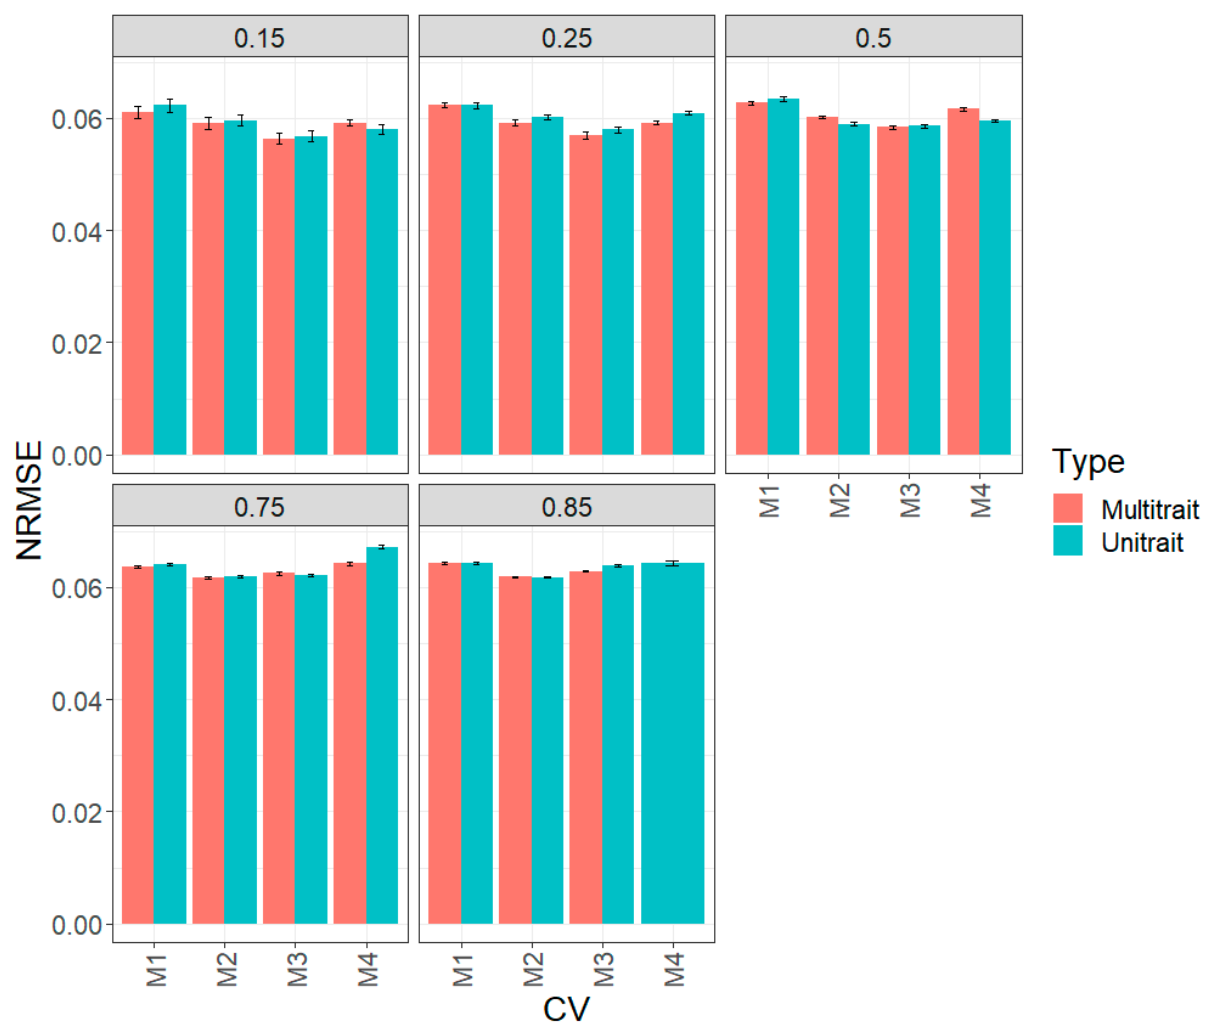

**Figure S4.** Prediction performance for wheat\_250 small data set in terms of normalized root mean square error (NRMSE) of the four methods of sparse testing (M1, M2, M3 and M4) under unit-trait and multi-trait models for 5 percentage of testing 15% (0.1), 25% (0.25), 50% (0.5), 75% (0.75) and 85% (0.85).



**Table S2.** Prediction performance for the wheat\_250 small data in terms of normalized root mean square error (NRMSE) and Average Pearson's correlation (APC) of the four sparse testing methods (CV) under the following proportion of testing (Prop\_testing): 15% (0.15), 25% (0.2), 50% (0.5), 75% (0.75) and 85% (0.85). NRMSE\_SE denotes the standard error of NRMSE and APC\_SE denotes the standard error of APC

| Dataset   | CV | Prop_testing | Type       | NRMSE | NRMSE_SE | APC   | APC_SE |
|-----------|----|--------------|------------|-------|----------|-------|--------|
| Wheat_250 | M1 | 0.15         | Multitrait | 0.061 | 0.002    | 0.786 | 0.014  |
| Wheat_250 | M1 | 0.15         | Unitrait   | 0.062 | 0.002    | 0.774 | 0.014  |
| Wheat_250 | M1 | 0.25         | Multitrait | 0.062 | 0.001    | 0.785 | 0.007  |
| Wheat_250 | M1 | 0.25         | Unitrait   | 0.062 | 0.001    | 0.777 | 0.008  |
| Wheat_250 | M1 | 0.5          | Multitrait | 0.063 | 0.001    | 0.781 | 0.004  |
| Wheat_250 | M1 | 0.5          | Unitrait   | 0.063 | 0.001    | 0.775 | 0.004  |
| Wheat_250 | M1 | 0.75         | Multitrait | 0.064 | 0.001    | 0.776 | 0.003  |
| Wheat_250 | M1 | 0.75         | Unitrait   | 0.064 | 0.000    | 0.771 | 0.002  |
| Wheat_250 | M1 | 0.85         | Multitrait | 0.064 | 0.001    | 0.772 | 0.002  |
| Wheat_250 | M1 | 0.85         | Unitrait   | 0.064 | 0.000    | 0.771 | 0.002  |
| Wheat_250 | M2 | 0.15         | Multitrait | 0.059 | 0.002    | 0.818 | 0.012  |
| Wheat_250 | M2 | 0.15         | Unitrait   | 0.060 | 0.002    | 0.810 | 0.012  |
| Wheat_250 | M2 |              |            |       |          |       |        |
